# Supplementary material
Source: publisher site journal article supplement (https://www.dovepress.com/article/445706)
Supplement: Supplementary file 1 [file get_supplementary_file.php]

Supplementary Table 1: Instrumental variables for positive results

| SNP         | effect | other_effec | other_beta. | exposur | beta.outcome | eaf.exposeaf.outcc | eaf.outcc |
|-------------|--------|-------------|-------------|---------|--------------|--------------------|-----------|
| rs10026792  | A      | G           | A           | G       | 0.0108       | 0.000170318        | 0.290404  |
| rs10129747  | G      | A           | G           | A       | 0.00936      | 0.000097           | 0.530254  |
| rs10896126  | G      | A           | G           | A       | -0.015       | 0.000183081        | 0.303582  |
| rs11152349  | A      | G           | A           | G       | 0.00991      | -0.0000848         | 0.302856  |
| rs11632215  | C      | A           | C           | A       | -0.0141      | 0.000300288        | 0.120179  |
| rs11720884  | G      | A           | G           | A       | 0.0112       | -0.0000734         | 0.250137  |
| rs11772627  | C      | G           | C           | G       | 0.0183       | 0.000191766        | 0.18202   |
| rs11811826  | A      | T           | A           | T       | 0.0132       | -0.000028634       | 0.224231  |
| rs12137234  | T      | C           | T           | C       | 0.0102       | -0.0000767         | 0.303772  |
| rs1582322   | G      | A           | G           | A       | 0.00994      | 0.0000573          | 0.604805  |
| rs1622515   | G      | A           | G           | A       | 0.00992      | 0.00000896         | 0.484704  |
| rs17175518  | A      | C           | A           | C       | 0.0115       | 0.000129384        | 0.232775  |
| rs17184707  | T      | C           | T           | C       | -0.0114381   | 0.000287483        | 0.212811  |
| rs1797235   | C      | G           | C           | G       | -0.01        | 0.00000164         | 0.374623  |
| rs2328887   | C      | T           | C           | T       | 0.0189       | -0.000389051       | 0.899467  |
| rs261809    | G      | A           | G           | A       | -0.00963     | 0.000131464        | 0.540636  |
| rs3101339   | C      | A           | C           | A       | 0.0143       | -0.000201981       | 0.603285  |
| rs34162196  | T      | C           | T           | C       | -0.0224      | 0.000166279        | 0.101001  |
| rs3764002   | T      | C           | T           | C       | 0.0131       | -0.00016516        | 0.261416  |
| rs4140799   | A      | G           | A           | G       | 0.00946      | -0.000212853       | 0.531856  |
| rs4149513   | A      | G           | A           | G       | 0.0117       | -0.000167949       | 0.493537  |
| rs4269101   | G      | T           | G           | T       | -0.0138      | 0.0000901          | 0.718948  |
| rs429358    | C      | T           | C           | T       | 0.0199       | -0.000137441       | 0.154208  |
| rs57499472  | C      | T           | C           | T       | 0.00991      | 0.0000693          | 0.404131  |
| rs62084586  | C      | T           | C           | T       | 0.0134       | -0.00002           | 0.165729  |
| rs72720396  | G      | A           | G           | A       | 0.0114       | 0.000075391        | 0.229157  |
| rs746868    | G      | C           | G           | C       | -0.0129      | 0.0000217          | 0.614662  |
| rs75641275  | C      | A           | C           | A       | -0.0142      | 0.000147522        | 0.143372  |
| rs7582086   | T      | G           | T           | G       | -0.00963     | -0.0000584         | 0.468273  |
| rs7808471   | C      | T           | C           | T       | -0.0115      | -0.0000497         | 0.322136  |
| rs8081370   | T      | C           | T           | C       | -0.0167      | -0.000213155       | 0.910232  |
| rs862227    | G      | A           | G           | A       | -0.00916     | -0.0000288         | 0.458327  |
| rs893856    | A      | G           | A           | G       | -0.0134      | 0.000179242        | 0.148988  |
| rs9385269   | T      | C           | T           | C       | 0.0121       | -0.0000742         | 0.524565  |
| rs10061973  | T      | G           | T           | G       | -0.0108521   | 0.000110987        | 0.5139    |
| rs10076975  | C      | T           | C           | T       | 0.0112       | -0.0000899         | 0.381413  |
| rs114497213 | T      | G           | T           | G       | 0.0273       | 0.00000432         | 0.05481   |
| rs11767283  | G      | A           | G           | A       | 0.0177       | -0.0000429         | 0.221709  |
| rs11859365  | C      | A           | C           | A       | 0.0226       | -0.00000186        | 0.253765  |
| rs1201289   | G      | T           | G           | T       | -0.0107      | -0.000133163       | 0.394525  |
| rs12663865  | A      | G           | A           | G       | 0.0128       | -0.000133735       | 0.758185  |
| rs12896749  | C      | G           | C           | G       | -0.0109641   | -0.000153577       | 0.384721  |
| rs12983532  | T      | C           | T           | C       | -0.0133895   | -0.00000171        | 0.251137  |
| rs1361016   | G      | T           | G           | T       | 0.0149567    | -0.000042          | 0.844853  |
| rs17050031  | T      | C           | T           | C       | -0.012       | 0.000219978        | 0.4801    |
| rs1876245   | C      | T           | C           | T       | 0.0151       | -0.000274613       | 0.431482  |
| rs1951286   | G      | T           | G           | T       | -0.0146      | -0.000029          | 0.644911  |
| rs2374424   | G      | A           | G           | A       | -0.0114      | 0.000135753        | 0.601525  |
| rs2827161   | G      | T           | G           | T       | 0.0107114    | 0.0000233          | 0.422842  |

|             |   |   |   |   |            |              |          |          |
|-------------|---|---|---|---|------------|--------------|----------|----------|
| rs28533540  | A | G | A | G | 0.0146     | -0.0000397   | 0.534203 | 0.535099 |
| rs28623270  | T | A | T | A | -0.0178    | 0.0000263    | 0.14872  | 0.148909 |
| rs2952140   | T | C | T | C | -0.0106774 | -0.000055777 | 0.482607 | 0.481946 |
| rs303817    | G | A | G | A | 0.0136     | -0.000177914 | 0.751146 | 0.752588 |
| rs3124402   | G | A | G | A | -0.022     | 0.0000861    | 0.733261 | 0.733399 |
| rs34555420  | T | G | T | G | -0.0238    | 0.000533665  | 0.097821 | 0.099245 |
| rs35287743  | T | G | T | G | -0.0282    | -0.000172815 | 0.115869 | 0.116368 |
| rs4002471   | T | C | T | C | -0.0192    | 0.000235393  | 0.547362 | 0.54887  |
| rs4278546   | G | A | G | A | 0.0126     | -0.000015    | 0.441085 | 0.438985 |
| rs45501495  | T | C | T | C | 0.0157     | 0.0000327    | 0.236013 | 0.235687 |
| rs4869859   | C | T | C | T | 0.014      | -0.000242584 | 0.449939 | 0.448643 |
| rs4982738   | A | G | A | G | 0.0109     | -0.0000696   | 0.582899 | 0.583874 |
| rs510161    | G | C | G | C | -0.0113    | -0.000123439 | 0.31037  | 0.310019 |
| rs552234    | A | G | A | G | -0.0116    | 0.000149573  | 0.495449 | 0.495102 |
| rs55930451  | T | C | T | C | -0.0171    | -0.00000855  | 0.108001 | 0.108681 |
| rs55985303  | A | G | A | G | 0.013      | 0.0000331    | 0.241079 | 0.239921 |
| rs59355765  | T | C | T | C | -0.0163    | 0.000317579  | 0.160079 | 0.160289 |
| rs6033437   | A | C | A | C | 0.0124683  | -0.000221853 | 0.257329 | 0.255732 |
| rs6089753   | T | C | T | C | -0.0115    | 0.000246352  | 0.530967 | 0.531784 |
| rs61882686  | A | C | A | C | 0.0197559  | 0.0000686    | 0.085234 | 0.085203 |
| rs631490    | C | G | C | G | -0.0151    | -0.0000697   | 0.709106 | 0.710542 |
| rs6465487   | G | A | G | A | -0.0124    | -0.0001193   | 0.399814 | 0.400112 |
| rs703987    | C | G | C | G | 0.0111218  | -0.0000723   | 0.615005 | 0.613616 |
| rs7254235   | G | A | G | A | -0.0106    | -0.000181098 | 0.577254 | 0.578807 |
| rs75887709  | G | A | G | A | -0.0159106 | 0.000301152  | 0.13588  | 0.136966 |
| rs7683782   | G | C | G | C | 0.0145     | -0.00000606  | 0.833405 | 0.833774 |
| rs790564    | C | A | C | A | 0.0147     | 0.000129233  | 0.722952 | 0.722403 |
| rs905575    | G | C | G | C | 0.0139     | 0.0000253    | 0.82397  | 0.824566 |
| rs9301837   | A | C | A | C | -0.0157    | -0.0000472   | 0.143273 | 0.142057 |
| rs9597870   | G | T | G | T | -0.0127    | 0.0000106    | 0.245844 | 0.246434 |
| rs9606833   | C | T | C | T | 0.017      | -0.0000589   | 0.243593 | 0.245025 |
| rs973526    | T | C | T | C | -0.0115    | 0.000222541  | 0.513307 | 0.514258 |
| rs9841174   | C | T | C | T | 0.0148     | -0.00015705  | 0.373913 | 0.373858 |
| rs9889161   | T | G | T | G | -0.0133    | 0.000174282  | 0.357929 | 0.358174 |
| rs10505667  | T | C | T | C | -0.0243    | -0.0000893   | 0.436    | 0.440247 |
| rs113524166 | T | G | T | G | 0.127      | -0.000801037 | 0.01086  | 0.011062 |
| rs113580100 | G | A | G | A | 0.0632     | -0.000476763 | 0.04376  | 0.042504 |
| rs11521361  | A | T | A | T | 0.0327     | -0.000159528 | 0.206901 | 0.20413  |
| rs11678849  | A | T | A | T | 0.0277     | -0.0000988   | 0.309133 | 0.310693 |
| rs144143483 | C | A | C | A | 0.115      | 0.000151904  | 0.013671 | 0.013858 |
| rs149870452 | C | T | C | T | -0.097     | 0.000435038  | 0.018477 | 0.018279 |
| rs150992808 | A | G | A | G | 0.0668096  | -0.000426526 | 0.037124 | 0.03776  |
| rs2819017   | T | C | T | C | 0.0417     | -0.000132533 | 0.098369 | 0.096973 |
| rs28614087  | A | C | A | C | 0.0245     | 0.0000811    | 0.447425 | 0.443756 |
| rs3741434   | C | T | C | T | -0.0355    | 0.0000744    | 0.140872 | 0.141999 |
| rs392542    | A | G | A | G | 0.0274     | -0.0000688   | 0.657947 | 0.660261 |
| rs7157038   | C | T | C | T | 0.0261     | -0.000138973 | 0.321506 | 0.32195  |
| rs10959890  | C | T | C | T | -0.0127    | -0.000115086 | 0.212297 | 0.213475 |
| rs1105388   | T | C | T | C | -0.0114    | 0.000201678  | 0.300147 | 0.300585 |
| rs11165829  | G | C | G | C | -0.0102    | -0.000111739 | 0.35997  | 0.360302 |
| rs11878917  | A | G | A | G | 0.015      | -0.0000835   | 0.109688 | 0.109267 |

|             |   |   |   |   |             |              |          |          |
|-------------|---|---|---|---|-------------|--------------|----------|----------|
| rs1470610   | C | G | C | G | -0.0122159  | -0.000236572 | 0.196185 | 0.195757 |
| rs429358    | C | T | C | T | -0.0149     | -0.000137441 | 0.154226 | 0.154996 |
| rs4676964   | T | C | T | C | 0.0134      | 0.000171875  | 0.510605 | 0.511329 |
| rs62169335  | T | C | T | C | -0.00969    | -0.0000949   | 0.543241 | 0.54437  |
| rs7791463   | A | G | A | G | 0.00955     | -0.0000592   | 0.534781 | 0.534761 |
| rs784251    | T | C | T | C | -0.0103     | -0.000308228 | 0.477649 | 0.476705 |
| rs79809011  | A | G | A | G | -0.0281     | -0.000368811 | 0.029465 | 0.029313 |
| rs10822159  | T | C | T | C | -0.0119     | 0.000133708  | 0.417863 | 0.416599 |
| rs12046000  | T | G | T | G | -0.0136     | -0.0000641   | 0.447325 | 0.446824 |
| rs12135360  | T | G | T | G | -0.00975357 | -0.000115555 | 0.563024 | 0.564507 |
| rs1229984   | C | T | C | T | 0.0482      | 0.000241505  | 0.976527 | 0.975853 |
| rs12513581  | C | T | C | T | -0.011      | -0.000050776 | 0.479763 | 0.479598 |
| rs13130794  | C | T | C | T | -0.012      | -0.000206319 | 0.368294 | 0.37091  |
| rs1387695   | G | T | G | T | 0.00996     | 0.000245625  | 0.574976 | 0.574086 |
| rs143223375 | G | C | G | C | -0.0266     | 0.0000289    | 0.035331 | 0.035439 |
| rs28478711  | G | A | G | A | -0.00953    | -0.000115333 | 0.475331 | 0.477117 |
| rs2883059   | C | T | C | T | 0.0117      | 0.000217948  | 0.425071 | 0.427659 |
| rs34178057  | C | A | C | A | 0.0165      | 0.000444207  | 0.099089 | 0.098124 |
| rs57994172  | A | T | A | T | -0.0146     | 0.0000465    | 0.125767 | 0.125384 |
| rs75413320  | C | T | C | T | 0.0165527   | 0.000113164  | 0.108113 | 0.109272 |
| rs7851830   | G | A | G | A | -0.0133     | 0.000112664  | 0.234411 | 0.235119 |
| rs8044722   | T | G | T | G | -0.01       | -0.000140121 | 0.378845 | 0.377865 |

| se. exposure | se. outcome | pval. outcop | pval. exposure | r2          | F           |
|--------------|-------------|--------------|----------------|-------------|-------------|
| 0.0018423    | 0.000127501 | 0.18         | 3.9E-09        | 0.0000485   | 20.45085623 |
| 0.00168126   | 0.000116375 | 0.41         | 0.000000026    | 0.0000436   | 18.40450703 |
| 0.00181919   | 0.00012603  | 0.15         | 1.6E-16        | 0.0000953   | 40.17800183 |
| 0.0018176    | 0.000125883 | 0.5          | 0.000000049    | 0.0000415   | 17.49886454 |
| 0.00258382   | 0.000178948 | 0.0929994    | 0.000000044    | 0.0000423   | 17.84211661 |
| 0.00193554   | 0.000134091 | 0.59         | 7.6E-09        | 0.0000469   | 19.7759779  |
| 0.00217099   | 0.000150629 | 0.2          | 3E-17          | 0.000100091 | 42.21897536 |
| 0.0020058    | 0.000138912 | 0.84         | 4.4E-11        | 0.0000608   | 25.63718097 |
| 0.00183744   | 0.000127257 | 0.54         | 0.000000028    | 0.0000441   | 18.5801977  |
| 0.00171571   | 0.000118803 | 0.630001     | 6.8E-09        | 0.0000473   | 19.93516556 |
| 0.00167077   | 0.000115789 | 0.94         | 2.9E-09        | 0.0000491   | 20.72189284 |
| 0.00197514   | 0.00013671  | 0.34         | 5.9E-09        | 0.0000472   | 19.91065962 |
| 0.00204011   | 0.000141054 | 0.0420001    | 0.000000021    | 0.0000438   | 18.4883157  |
| 0.00174235   | 0.000120706 | 0.99         | 8.9E-09        | 0.000047    | 19.84456907 |
| 0.00277607   | 0.000191798 | 0.0430002    | 8.8E-12        | 0.0000649   | 27.38769239 |
| 0.00167902   | 0.000116414 | 0.26         | 9.8E-09        | 0.000046    | 19.42244262 |
| 0.00170546   | 0.000118124 | 0.0879995    | 6.2E-17        | 0.0000973   | 41.05343102 |
| 0.00277168   | 0.000191979 | 0.39         | 7.1E-16        | 0.0000908   | 38.30664603 |
| 0.00190081   | 0.000131517 | 0.21         | 5.1E-12        | 0.0000665   | 28.04305663 |
| 0.00167846   | 0.000116192 | 0.0669993    | 0.000000018    | 0.0000445   | 18.78280058 |
| 0.00167139   | 0.000115777 | 0.15         | 2.2E-12        | 0.0000688   | 29.012876   |
| 0.00185921   | 0.000128861 | 0.48         | 1.1E-13        | 0.0000771   | 32.50844113 |
| 0.00231362   | 0.000159861 | 0.39         | 6.7E-18        | 0.000103764 | 43.76826127 |
| 0.00171869   | 0.000118939 | 0.56         | 8.1E-09        | 0.0000473   | 19.95908852 |
| 0.00226174   | 0.00015606  | 0.9          | 3.2E-09        | 0.0000496   | 20.92590001 |
| 0.00198541   | 0.000137314 | 0.59         | 8.7E-09        | 0.0000461   | 19.4555264  |
| 0.00171452   | 0.000118812 | 0.86         | 5.2E-14        | 0.0000789   | 33.27818129 |
| 0.00238518   | 0.000164924 | 0.37         | 2.9E-09        | 0.0000493   | 20.77694515 |
| 0.00167381   | 0.000115959 | 0.61         | 8.8E-09        | 0.0000462   | 19.47136655 |
| 0.00178604   | 0.00012363  | 0.69         | 1.1E-10        | 0.0000581   | 24.51489691 |
| 0.00293795   | 0.00020361  | 0.29         | 0.000000014    | 0.0000454   | 19.14629879 |
| 0.00167238   | 0.000115838 | 0.81         | 0.000000043    | 0.0000417   | 17.58956969 |
| 0.00234923   | 0.00016276  | 0.27         | 0.000000013    | 0.0000453   | 19.0933444  |
| 0.00168183   | 0.000116509 | 0.52         | 7.2E-13        | 0.0000726   | 30.6365367  |
| 0.00191598   | 0.000115889 | 0.34         | 0.000000015    | 0.0000588   | 27.09326538 |
| 0.0019672    | 0.000118956 | 0.450001     | 0.000000011    | 0.0000596   | 27.44810764 |
| 0.00423605   | 0.00025772  | 0.99         | 1.1E-10        | 0.0000773   | 35.6170025  |
| 0.00231943   | 0.000140378 | 0.760001     | 2.5E-14        | 0.000107795 | 49.63879858 |
| 0.00219679   | 0.000132855 | 0.99         | 9.4E-25        | 0.000192877 | 88.82575424 |
| 0.0019595    | 0.000118542 | 0.26         | 0.000000044    | 0.000055    | 25.3113131  |
| 0.00223239   | 0.000135016 | 0.32         | 0.000000011    | 0.0000598   | 27.54268066 |
| 0.00196607   | 0.0001189   | 0.2          | 0.000000025    | 0.0000569   | 26.20551277 |
| 0.00223333   | 0.000135089 | 0.99         | 0.000000002    | 0.0000674   | 31.05096241 |
| 0.00265295   | 0.0001602   | 0.8          | 0.000000017    | 0.0000586   | 27.00384161 |
| 0.0019207    | 0.000116217 | 0.0589997    | 3.5E-10        | 0.0000725   | 33.37362726 |
| 0.00193122   | 0.000116852 | 0.0189998    | 5E-15          | 0.000112104 | 51.62318961 |
| 0.00199948   | 0.000120834 | 0.81         | 3E-13          | 0.0000974   | 44.85335275 |
| 0.00195609   | 0.000118287 | 0.25         | 4.9E-09        | 0.0000628   | 28.90805944 |
| 0.00193719   | 0.000117189 | 0.84         | 0.000000032    | 0.000056    | 25.78657242 |

|            |             |           |             |             |             |
|------------|-------------|-----------|-------------|-------------|-------------|
| 0.00192478 | 0.000116411 | 0.73      | 2.8E-14     | 0.000106694 | 49.13150527 |
| 0.00273746 | 0.000165415 | 0.88      | 7.3E-11     | 0.0000805   | 37.07830223 |
| 0.00191504 | 0.000115779 | 0.630001  | 0.000000025 | 0.0000569   | 26.21645115 |
| 0.00220965 | 0.00013393  | 0.18      | 8E-10       | 0.0000689   | 31.74651487 |
| 0.00215651 | 0.000130464 | 0.51      | 1.9E-24     | 0.000189355 | 87.20310857 |
| 0.00321908 | 0.000193601 | 0.0059    | 1.5E-13     | 0.0000997   | 45.91374947 |
| 0.00301071 | 0.000181738 | 0.34      | 7E-21       | 0.000163166 | 75.14080201 |
| 0.0019244  | 0.000116486 | 0.0439997 | 1.5E-23     | 0.000183502 | 84.50755239 |
| 0.00193806 | 0.0001173   | 0.9       | 9.3E-11     | 0.0000777   | 35.79099898 |
| 0.00225713 | 0.000136632 | 0.81      | 3.7E-12     | 0.0000887   | 40.82941169 |
| 0.00192207 | 0.000116309 | 0.0369999 | 3.1E-13     | 0.0000972   | 44.7377917  |
| 0.00196936 | 0.000119122 | 0.56      | 0.000000035 | 0.0000574   | 26.41113522 |
| 0.00206615 | 0.000124996 | 0.32      | 0.000000045 | 0.0000547   | 25.1689512  |
| 0.00191252 | 0.000115677 | 0.2       | 1.1E-09     | 0.0000678   | 31.23168744 |
| 0.00307567 | 0.000185634 | 0.96      | 0.000000029 | 0.000056    | 25.80286258 |
| 0.00223629 | 0.000135537 | 0.81      | 6.6E-09     | 0.0000616   | 28.36053292 |
| 0.00260966 | 0.000157716 | 0.0439997 | 4.7E-10     | 0.000071    | 32.70634027 |
| 0.00220977 | 0.000133878 | 0.0969996 | 0.000000017 | 0.0000594   | 27.36084307 |
| 0.0019184  | 0.00011602  | 0.0340001 | 1.8E-09     | 0.0000664   | 30.55384505 |
| 0.0034254  | 0.000207218 | 0.74      | 0.000000008 | 0.0000609   | 28.02508509 |
| 0.00210253 | 0.00012739  | 0.59      | 6E-13       | 0.0000946   | 43.544294   |
| 0.00195628 | 0.00011829  | 0.31      | 2.7E-10     | 0.0000732   | 33.72560047 |
| 0.00197362 | 0.000119317 | 0.55      | 0.000000017 | 0.0000586   | 26.9720106  |
| 0.00194012 | 0.000117368 | 0.12      | 0.000000043 | 0.0000552   | 25.39648479 |
| 0.0028148  | 0.00016967  | 0.0759994 | 0.000000016 | 0.0000594   | 27.37363756 |
| 0.00257399 | 0.000155901 | 0.97      | 0.000000019 | 0.0000582   | 26.7999802  |
| 0.00214766 | 0.000129785 | 0.32      | 7.9E-12     | 0.0000865   | 39.80934956 |
| 0.00251917 | 0.000152627 | 0.87      | 0.000000036 | 0.0000559   | 25.74278092 |
| 0.00273045 | 0.000165744 | 0.77      | 8.1E-09     | 0.0000608   | 28.01568031 |
| 0.00223046 | 0.000134788 | 0.94      | 0.000000011 | 0.0000602   | 27.73472165 |
| 0.00223087 | 0.000134611 | 0.66      | 2.7E-14     | 0.000106319 | 48.95897184 |
| 0.00192962 | 0.000116736 | 0.0569994 | 2.5E-09     | 0.0000662   | 30.46416159 |
| 0.00198025 | 0.000119796 | 0.19      | 8.5E-14     | 0.000102252 | 47.08589685 |
| 0.0020015  | 0.000121007 | 0.15      | 2.8E-11     | 0.0000816   | 37.55210745 |
| 0.00536649 | 0.000116573 | 0.44      | 0.0000058   | 0.00029129  | 18.92394702 |
| 0.0279812  | 0.000598937 | 0.18      | 0.0000057   | 0.000346299 | 22.49888159 |
| 0.0134028  | 0.000296395 | 0.11      | 0.0000024   | 0.000334193 | 21.71207348 |
| 0.00657514 | 0.000144187 | 0.27      | 0.00000067  | 0.000350265 | 22.7566446  |
| 0.00597292 | 0.000129813 | 0.44      | 0.0000035   | 0.000327946 | 21.30608512 |
| 0.0251596  | 0.000544232 | 0.780001  | 0.0000046   | 0.000358592 | 23.29785557 |
| 0.0200442  | 0.000439502 | 0.32      | 0.0000013   | 0.000341393 | 22.1800396  |
| 0.014184   | 0.000306727 | 0.17      | 0.0000025   | 0.000319104 | 20.73149242 |
| 0.00891559 | 0.000195288 | 0.5       | 0.0000029   | 0.000308603 | 20.0489988  |
| 0.00539422 | 0.000117623 | 0.49      | 0.0000056   | 0.000296625 | 19.27061811 |
| 0.00760024 | 0.000165604 | 0.649999  | 0.000003    | 0.000305219 | 19.82910527 |
| 0.00559887 | 0.000122308 | 0.57      | 0.00000099  | 0.000337953 | 21.95647091 |
| 0.00569264 | 0.000123623 | 0.26      | 0.0000047   | 0.00029637  | 19.25403332 |
| 0.00209611 | 0.000141498 | 0.42      | 1.5E-09     | 0.0000537   | 24.73852916 |
| 0.00187563 | 0.000126848 | 0.11      | 1.3E-09     | 0.0000544   | 25.06552259 |
| 0.00177865 | 0.000120351 | 0.35      | 9.8E-09     | 0.0000479   | 22.10422451 |
| 0.00274812 | 0.000186143 | 0.649999  | 0.000000046 | 0.0000441   | 20.312535   |

|            |             |           |             |             |             |
|------------|-------------|-----------|-------------|-------------|-------------|
| 0.00215779 | 0.000146149 | 0.11      | 0.000000015 | 0.0000471   | 21.70062528 |
| 0.00236847 | 0.000159861 | 0.39      | 3.6E-10     | 0.0000575   | 26.53081982 |
| 0.00172438 | 0.000116657 | 0.14      | 9.6E-15     | 0.0000891   | 41.09031508 |
| 0.00173523 | 0.000117403 | 0.42      | 0.000000024 | 0.0000466   | 21.46806379 |
| 0.00171063 | 0.000115738 | 0.61      | 0.000000024 | 0.0000454   | 20.91696864 |
| 0.00171651 | 0.000116087 | 0.0079001 | 1.7E-09     | 0.0000533   | 24.59264831 |
| 0.00508482 | 0.000344787 | 0.29      | 0.000000034 | 0.000045    | 20.76203088 |
| 0.00173385 | 0.000117415 | 0.25      | 6.4E-12     | 0.000069    | 22.61603364 |
| 0.00172363 | 0.000116608 | 0.58      | 2.5E-15     | 0.000092    | 30.13754949 |
| 0.00172435 | 0.000116759 | 0.32      | 0.000000015 | 0.0000468   | 15.33727984 |
| 0.00558483 | 0.000375999 | 0.52      | 6E-18       | 0.000106579 | 34.92233011 |
| 0.00171278 | 0.000115854 | 0.66      | 1.3E-10     | 0.0000604   | 19.7972982  |
| 0.00177878 | 0.00012027  | 0.0860003 | 1.7E-11     | 0.0000666   | 21.82193048 |
| 0.00173417 | 0.000117422 | 0.0359998 | 9.2E-09     | 0.0000485   | 15.89823137 |
| 0.00476237 | 0.000321681 | 0.93      | 0.000000024 | 0.0000481   | 15.7657755  |
| 0.0017265  | 0.000116748 | 0.32      | 0.000000034 | 0.0000453   | 14.85361985 |
| 0.00172733 | 0.000116848 | 0.0619998 | 1.3E-11     | 0.0000668   | 21.90315275 |
| 0.00286516 | 0.000194719 | 0.0230001 | 7.7E-09     | 0.0000489   | 16.01940569 |
| 0.00263074 | 0.000178127 | 0.79      | 0.000000028 | 0.0000469   | 15.37110421 |
| 0.00276055 | 0.000185758 | 0.54      | 0.000000002 | 0.0000528   | 17.31269577 |
| 0.00201723 | 0.000136383 | 0.41      | 4.5E-11     | 0.0000634   | 20.77116902 |
| 0.00176015 | 0.000119183 | 0.24      | 0.000000013 | 0.0000472   | 15.45999786 |
